# Supplementary material for: A short history of beer brewing: Alcoholic fermentation and yeast technology over time
Source: PubMed Central journal article supplement — EMBO Rep. 2022 Nov 21;23(12):e56355. doi: 10.15252/embr.202256355 (PMC9724654; doi:10.15252/embr.202256355), 2022-11-21
Supplement: EMBR-23-e56355-s001.pdf [file EMBR-23-e56355-s001.pdf]

# Alcoholic fermentation and yeast technology over time

Luis Raihofer, Martin Zarnkow, Mathias Hutzler, and Martina Gastl

DOI: [10.15252/embr.202256355](https://doi.org/10.15252/embr.202256355)

Corresponding author: Luis Raihofer ([luis.raihofer@tum.de](mailto:luis.raihofer@tum.de))

---

## Review Timeline:

Submission Date:

24th Oct 22

Accepted:

7th Nov 22

---

Editor: Holger Breithaupt

## Transaction Report:

This article was editorially reviewed.
